# Supplementary material
Source: PubMed Central journal article supplement (PMC5729635)
Supplement: Supp_Fig1.pdf [file Supp_Fig1.pdf]

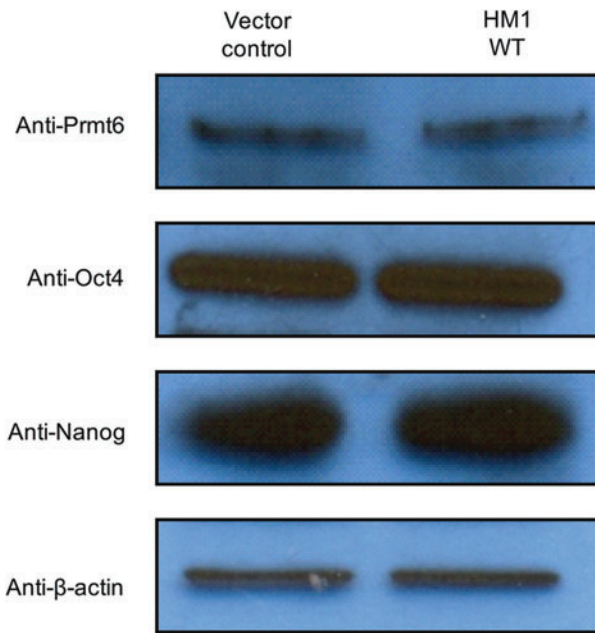

**SUPPLEMENTARY FIG. S1.** Protein expression levels of Oct4 and Nanog in both vector control and wild-type cells are compatible. Western blot with cell extracts from vector control-transfected cells and wild-type cells was performed using antibodies against Prmt6, Oct4, and Nanog. Beta-actin served as loading control.
