# Supplementary material
Source: PubMed Central journal article supplement (PMC5729635)
Supplement: Supp_Fig2.pdf [file Supp_Fig2.pdf]

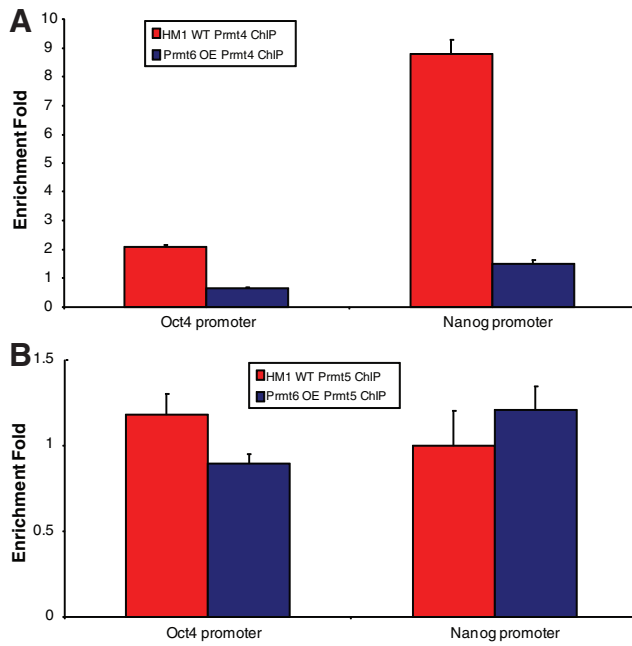

**SUPPLEMENTARY FIG. S2.** Overexpression of Prmt6 decreased Prmt4 binding to promoters of pluripotency genes. ChIP was performed using **(A)** anti-Prmt4 antibody and **(B)** anti-Prmt5 antibody respectively on both wild-type and Prmt6-overexpressing cells. ChIP DNA was analyzed by quantitative real-time polymerase chain reaction (PCR) with primers located at *Oct4* and *Nanog* promoter regions. Fold enrichments were calculated from the apparent IP efficiency and normalized to the level at a control region defined as 1.0 for a given extract.
