# Supplementary material
Source: PubMed Central journal article supplement (PMC5729635)
Supplement: Supp_Fig3.pdf [file Supp_Fig3.pdf]

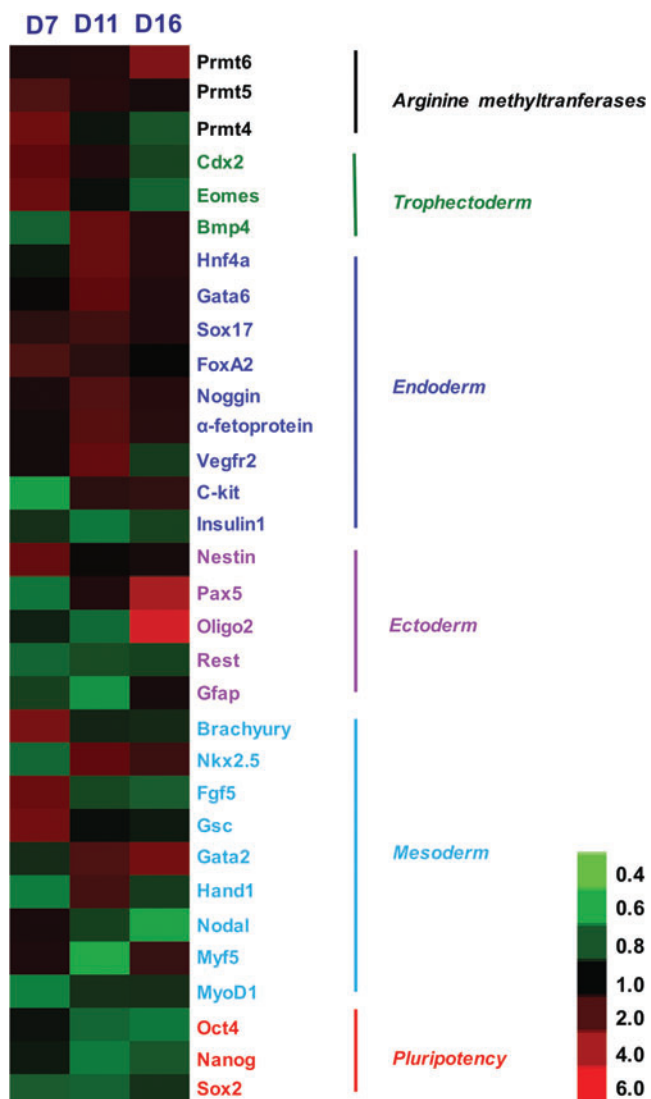

**SUPPLEMENTARY FIG. S3.** Overexpression of Prmt6 during embryoid body (EB) formation is associated with higher level of endoderm marker genes. Heat map represents the relative level (Prmt6 OE EB vs. vector control EB) of various lineage markers at different time points (day 7, day 11, and day 16 of EB formation). Gene expression was normalized to *beta-actin* first and the normalized expression levels were compared between Prmt6 OE EB and vector control EB. The mean levels are shown in the heat map.
