# Supplementary material
Source: PubMed Central journal article supplement (PMC5729635)
Supplement: Supp_Fig4.pdf [file Supp_Fig4.pdf]

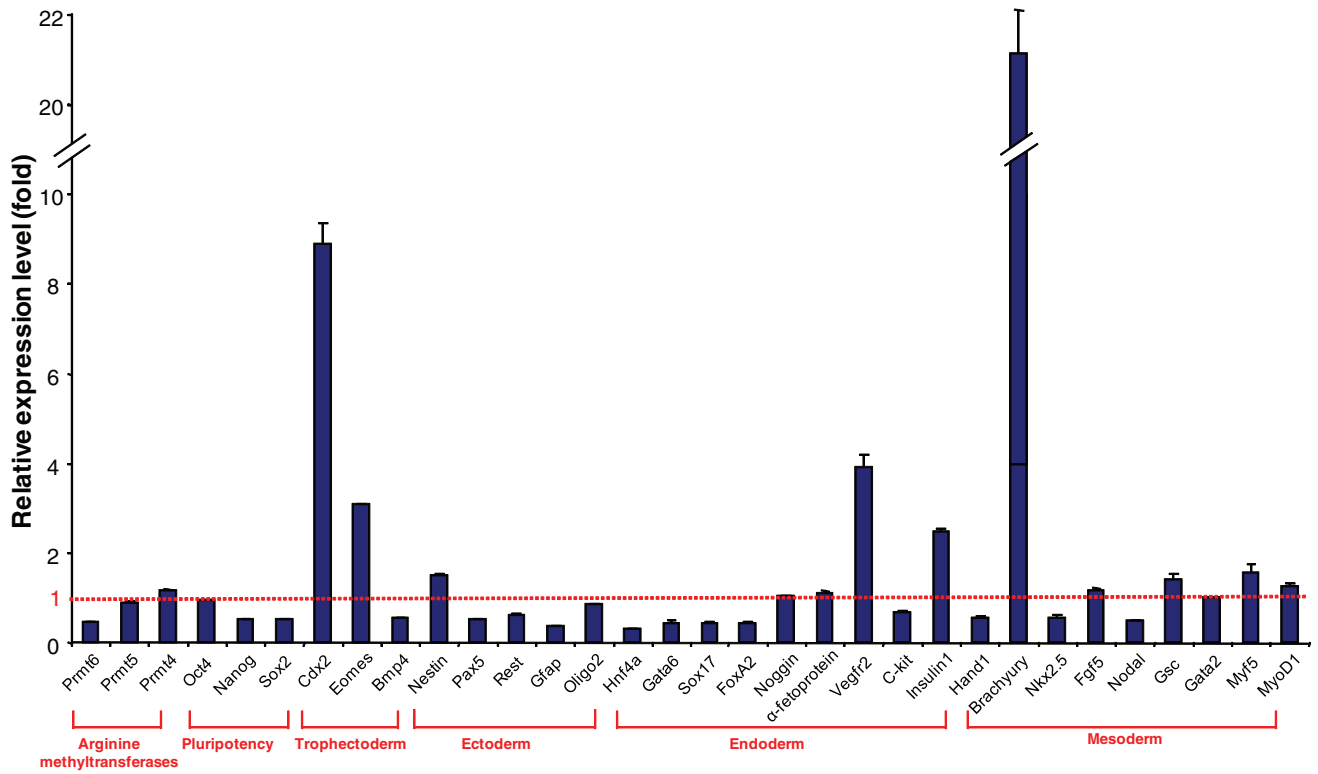

**SUPPLEMENTARY FIG. S4.** EBs with depletion of *Prmt6* expresses trophoctoderm and mesoderm lineages in higher level. Gene expression was normalized to *beta-actin* first and the normalized expression levels were compared between *Prmt6* RNAi EB and vector control EB.
