# Supplementary material
Source: PubMed Central journal article supplement (PMC5729635)
Supplement: Supp_Table1.pdf [file Supp_Table1.pdf]

SUPPLEMENTARY TABLE S1. LIST OF PRIMERS USED FOR REAL-TIME POLYMERASE CHAIN REACTION

| <i>List of primers</i> |                                                                                                                                                                                          |
|------------------------|------------------------------------------------------------------------------------------------------------------------------------------------------------------------------------------|
| <i>cDNA-qPCR</i>       |                                                                                                                                                                                          |
| <i>Genes</i>           | <i>Sequences</i>                                                                                                                                                                         |
| Prmt6                  | AGGTGAAGCAGCACTATGGCGTGGA<br>TATG<br>GAAACCAGACGGCGAAACCATGTA<br>GAGG                                                                                                                    |
| Prmt5                  | TCAGGCCACCTAGGGCTACA<br>GCTGCTGGCTTGTGTCTCT                                                                                                                                              |
| Prmt4                  | TCCACATGCTGCATTACAGGGCTAGT<br>TCCACCTGTGCCACAATACTGATGT<br>CATA                                                                                                                          |
| Oct4                   | TTGGGCTAGAGAAGGATGTGGTT<br>GGAAAAGGGACTGAGTAGAGTGTGG                                                                                                                                     |
| Nanog                  | GGTTGAAGACTAGCAATGGTCTGA<br>TGCAATGGATGCTGGGATACTC                                                                                                                                       |
| Sox2                   | CCAGGAGAACCCCAAGATGCACAACT<br>AAGCCTCCGGGAAGCGTACTTAT<br>CCTT                                                                                                                            |
| Rex1                   | AGATGGCTTCCCTGACGGATACCTA<br>GAGT<br>CTCTTGCTTCGTCCCCTTTGTCTATGTAC                                                                                                                       |
| Cdx2                   | CGCAGAACTTTGTGTCAGTCCCTCCGCAG<br>TACC<br>GTATTCCGGCGGGGCTGCTGTAGCCCA<br>TAGC                                                                                                             |
| Bmp4                   | GTTCCCTGGACACCTCATCACAGCACTACT<br>GTAACGATCGGCTGATTCTGACATGCT<br>GGCCCTATGGCTCAAATTCC<br>CCTGCCCTGTTGGTGATG                                                                              |
| Eomes                  | AGAGGAAGAGCAGCAAGGCCATGAC<br>TCCCTGACTCTGCTCCTTCTTCTTCAT                                                                                                                                 |
| Nestin                 | GGGCGCAGACGGCATGTATGATAAAA<br>AGTCGCATCTGAGCTTCATCCGAGTCTTC<br>CCCTTCCGTTGTAAGCCATGCCAGTATGA                                                                                             |
| Pax5                   | TGGTGCTTCAGGTGTGCCGTGTAGTGAT<br>AAAACAAGGCGCTGGCAGCTGAA<br>CTGAA                                                                                                                         |
| Rest                   | TTGTTCTCTGCCTCCAGCCTCAGGTTGGT<br>GGGAGCGAGCGGGAGGAGGACGAA<br>GCAGTCCGAAATGGGTCCAGGCCGA<br>AGT                                                                                            |
| Gfap                   | TCAGCACGCGGAGGTCAAGCTACGAG<br>GAC<br>CAGAAGGAGTTCGAGAAGGCCGG<br>GATG                                                                                                                     |
| Oligo2                 | TGTGCAATGCATGCGGTCTCTACAGCA<br>TTCATAGCAAGTGGTTCGAGGCCACCC<br>TGAAAGGCGAGGTGGTGGCGAGTAG<br>CAACGCCTTCCAAGACTTGCTAGCATCT<br>CCTACGCCAACATGAACTCGATGA<br>GTAGAAAGGGAAGAGGTCCATGATCC<br>ACT |
| Hand1                  | CCTGCCCAAACGAAAAGGCTCAGGAC<br>CCAA                                                                                                                                                       |

SUPPLEMENTARY TABLE S1. (CONTINUED)

| <i>List of primers</i>    |                                                                        |
|---------------------------|------------------------------------------------------------------------|
| <i>cDNA-qPCR</i>          |                                                                        |
| <i>Genes</i>              | <i>Sequences</i>                                                       |
|                           | CGACCGCCATCCGTCTTTTGTAGTTCA<br>GCC                                     |
| Nkx2.5                    | CACTAAATGGGCTGGTGAGGATGGAT<br>TGA<br>TCCTGGGTTGAATTTGGTCTGTAGGTCA      |
| Gata2                     | GGCCTCTTCTTCTGCAGGGGGTAGTGTAG<br>GCACATAGGAGGGATAGTGGGTATCGG           |
| Fgf5                      | GCAGATCTACCCGGATGGCAAAGT<br>CAATG<br>GTTCTGTGGATCGCGGACGCATAGGTATT     |
| Brachyury                 | GAGCTGTGGCTGCGCTTCAAGGAGC<br>TAAC<br>CCCCAGGTACCCACTCCCCGTTACATA       |
| Nodal                     | TTCACCGTCAATTCCTTCTCAGGTCACGTT<br>GCGACAGGTACAGGTGGGGTGTAGGG           |
| Gsc                       | GCACCTCCTCGGACTACGGCCGCTTC<br>CACCAGTACAGAACCGGGGCCCTCG<br>TAGC        |
| Noggin                    | CACTACGACCCGGGCTTTATGGCTACTTC<br>GGAGAACTCCAGCCCTTTGATCTCGC            |
| Myf5                      | GAAGGTCAACCAAGCTTTCGAGACGCTC<br>AGCTCTGTCCCGGAGGCTGTAATAGTTC           |
| $\alpha$ -fetoprotein     | GCTGCGCTCTCTACCAGACCTTAGGAG<br>CACAGGGCTTGCTTCATTCTTATACACA            |
| MyoD1                     | AAAGTGAATGAGGCCTTCGAGACGC<br>TCAA<br>CATCTGAGTCGCCACTGTAGTGCTCGCT      |
| Vegfr2                    | GAATGCGGCGGTGGTGACAGTATCTT<br>GGCGATGAATGGTATCTGTAATCTCGAA             |
| C-kit                     | AGAGTTAATAGTTGAAGCTGGCGACACC<br>TTGGCAGGATCTCTAACAACACGT<br>AAAT       |
| Insulin1                  | CCAAACCCACCAGGCTTTTGTCAA<br>CAG<br>GGTGCAGCACTGATCCACAATGCCAC          |
| $\beta$ -actin            | ACCAACTGGGACGACATGGAGAA<br>TACCACCAGAGGCATACAGGGAC                     |
| <i>ChIP-qPCR</i>          |                                                                        |
| Oct4 promoter             | GGATTGGGGAGGGAGAGG<br>TGAAACCGT<br>TGGAAGCTTAGCCAGGTTT<br>GAGGATCCAC   |
| Nanog promoter            | CTCTTTCTGTGGGAAGGCTG<br>CGGCTCACTT<br>CATGTGAGTGTGATGGCGAG<br>GGAAGGGA |
| ChIP-qPCR control primers | CCCCTTTCTGAAGCACTCTG<br>TAAGGCGTCATTTCCCAAAG                           |

qPCR, quantitative polymerase chain reaction; ChIP, chromatin immunoprecipitation.

(continued)
